# Supplementary material for: Bio-based, robust, shape memory, self-healing and recyclable elastomers based on a semi-interpenetrating dynamic network
Source: Royal Society of Chemistry journal article supplement (doi:10.1039/d1ta06299a), 2021-01-01
Supplement: d1ta06299a1.pdf [file d1ta06299a1.pdf]

## Supplementary Information

### **Bio-based, Robust, Shape Memory, Self-Healing and Recyclable Elastomer Based on Semi-interpenetrating Dynamic Network**

Xin Qi,<sup>1</sup> Jichuan Zhang,<sup>1,2</sup> Liqun Zhang<sup>1,2</sup> and Dongmei Yue\*<sup>1,2</sup>

<sup>1</sup> State Key Laboratory of Organic-Inorganic Composites, Beijing University of Chemical Technology, Beijing 100029, PR China.

<sup>2</sup> Key Laboratory of Beijing City on Preparation and Processing of Novel Polymer Materials, Beijing University of Chemical Technology, Beijing 100029, PR China.

#### **Shape memory tests program**

- 1) Apply a force of 0.001N to make the sample vertical, then heat to 70°C (5°C/min) and keep it for 5 minutes;
- 2) Raise the stress to 0.5N (0.2N/min);
- 3) Maintain a constant stress of 0.5N, reduce the temperature to -10°C (5°C/min), and keep it for 5 minutes;
- 4) Reduce the stress to 0.001N (0.2N/min);
- 5) Raise the temperature to 70°C (5°C/min) and keep it for 5 minutes;
- 6) Raise the temperature to 160°C (10°C/min), then increase the stress to 0.2N (0.2N/min), keep it for 1 hour;
- 7) Keep a constant temperature of 160°C, reduce the stress to 0.001N (0.2N/min), and keep it for 10 minutes;
- 8) Cool to 70°C (5°C/min);
- 9) Raise the stress to 0.6N (0.2N/min);
- 10) Cool to -10°C (5°C/min) and keep it for 5 minutes;
- 11) Reduce the force to 0.001N (0.2N/min);
- 12) Raise the temperature to 70°C (5°C/min) and keep it for 5 minutes.

**Table S1** Detailed composition of E<sub>x</sub>-DTSA<sub>y</sub>

| Sample name | EEUG (phr) | EUG (phr) | DTSA (phr) | IM (phr) | Zn(Ac) <sub>2</sub> (phr) | 4010NA (phr) |
|-------------|------------|-----------|------------|----------|---------------------------|--------------|
| E0-DTSA0.5  | 100        | <b>0</b>  | 0.5        | 0.06     | 0.15                      | 1            |
| E10-DTSA0.5 | 100        | <b>10</b> | 0.5        | 0.06     | 0.15                      | 1            |
| E20-DTSA0.5 | 100        | <b>20</b> | 0.5        | 0.06     | 0.15                      | 1            |
| E30-DTSA0.5 | 100        | <b>30</b> | 0.5        | 0.06     | 0.15                      | 1            |
| E40-DTSA0.5 | 100        | <b>40</b> | 0.5        | 0.06     | 0.15                      | 1            |
| E50-DTSA0.5 | 100        | <b>50</b> | 0.5        | 0.06     | 0.15                      | 1            |
| E30-DTSA0.8 | 100        | 30        | <b>0.8</b> | 0.1      | 0.24                      | 1            |
| E30-DTSA1.0 | 100        | 30        | <b>1.0</b> | 0.12     | 0.30                      | 1            |
| E30-DTSA1.5 | 100        | 30        | <b>1.5</b> | 0.18     | 0.45                      | 1            |

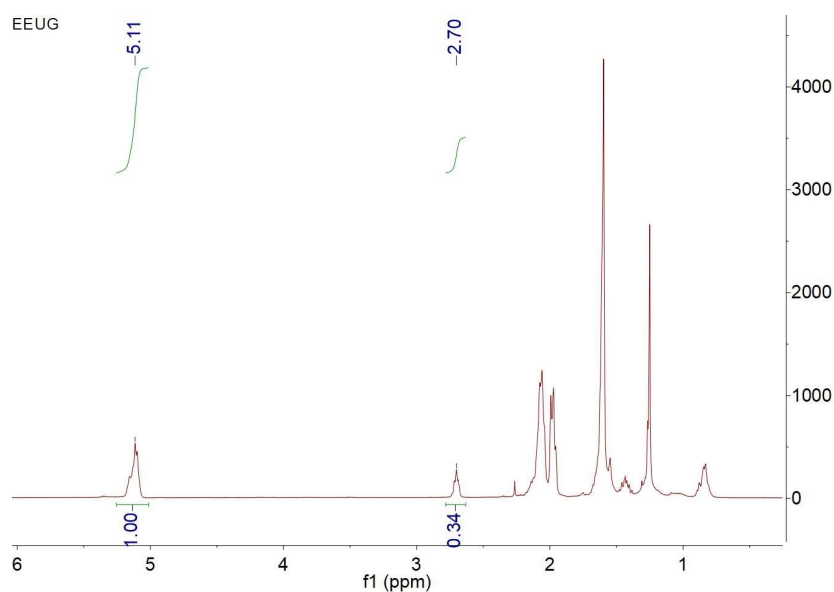

**Figure S1.** <sup>1</sup>H NMR spectrum of EEUG. The peaks at 5.11 ppm, 2.70 ppm are attributed to the proton resonance peak of C=C and epoxy groups separately. Epoxy content =  $A_{2.70}/(A_{5.11}+A_{2.70}) * 100$ , where  $A_{2.70}$  and  $A_{5.11}$  are resonance peak area of protons epoxy groups and C=C separately.<sup>[1]</sup>

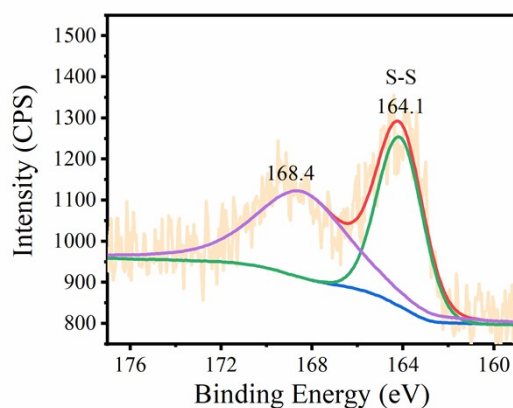

**Figure S2.** High-resolution XPS S 2p spectra of  $E_x$ -DTSA $_y$ . The peak at 164.1 eV indicating the presence of disulfide bonds. Another peak at 168.0 eV was assigned to oxidized sulfur, probably generated by air oxidation of disulfide bonds. [2]

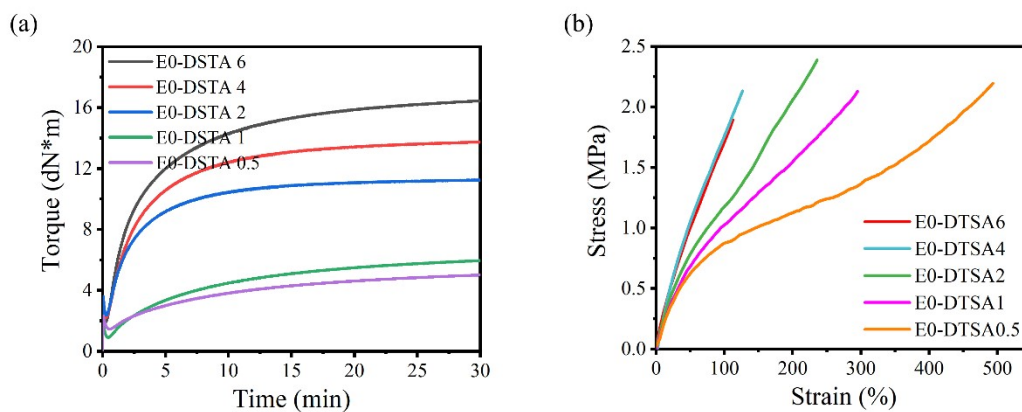

**Figure S3.** The effect of DTSA dosage on mechanical properties. (a) Vulcanization curves and (b) stress-strain curves of E0-DTSA $_y$  (with different DTSA content).

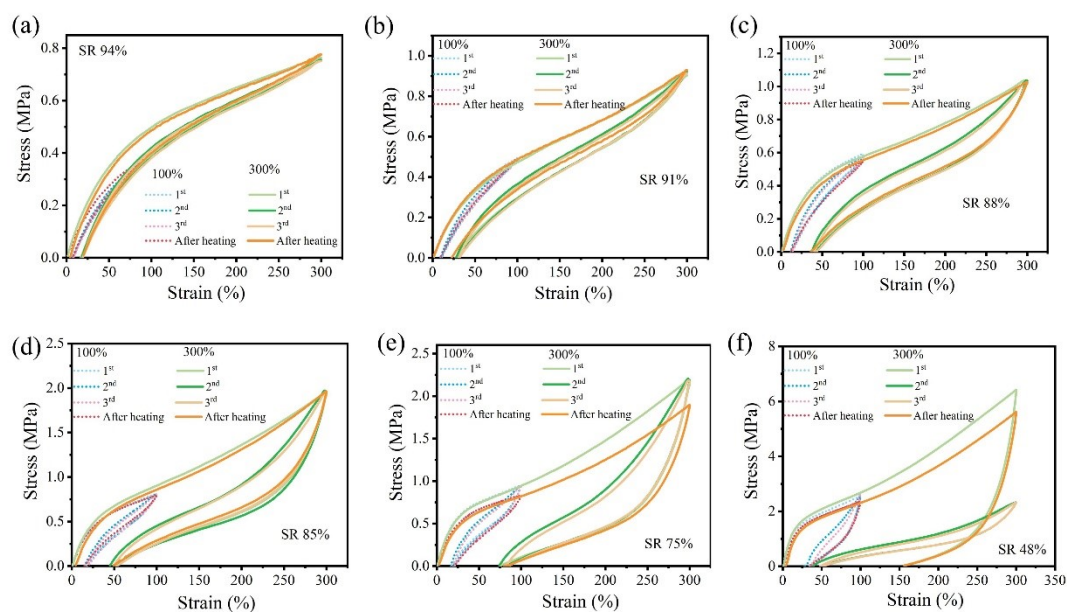

**Figure S4.** Loading–unloading curves of (a) E0-DTSA0.5, (b) E10-DTSA0.5, (c) E20-DTSA0.5, (d) E30-DTSA0.5, (e) E40-DTSA0.5, (f) E50-DTSA0.5, under strain of 100% and 300%.

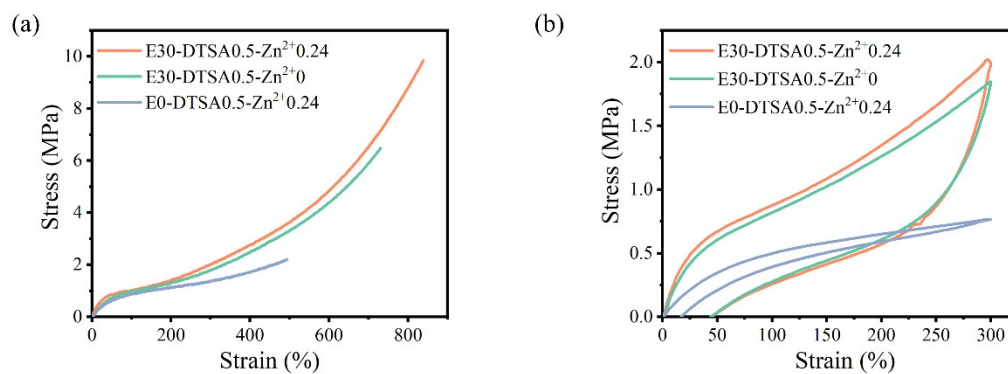

**Figure S5.** Contrast of energy dissipation between coordination bonds and EUG crystals. (a) stress-strain curves and (b) Loading–unloading curves of E0-DTSA0.5- $Zn^{2+}0.24$ (only coordination bonds), E30-DTSA0.5- $Zn^{2+}0$ (only EUG crystals), E0-DTSA0.5- $Zn^{2+}0.24$  (coordination bonds and EUG crystals).

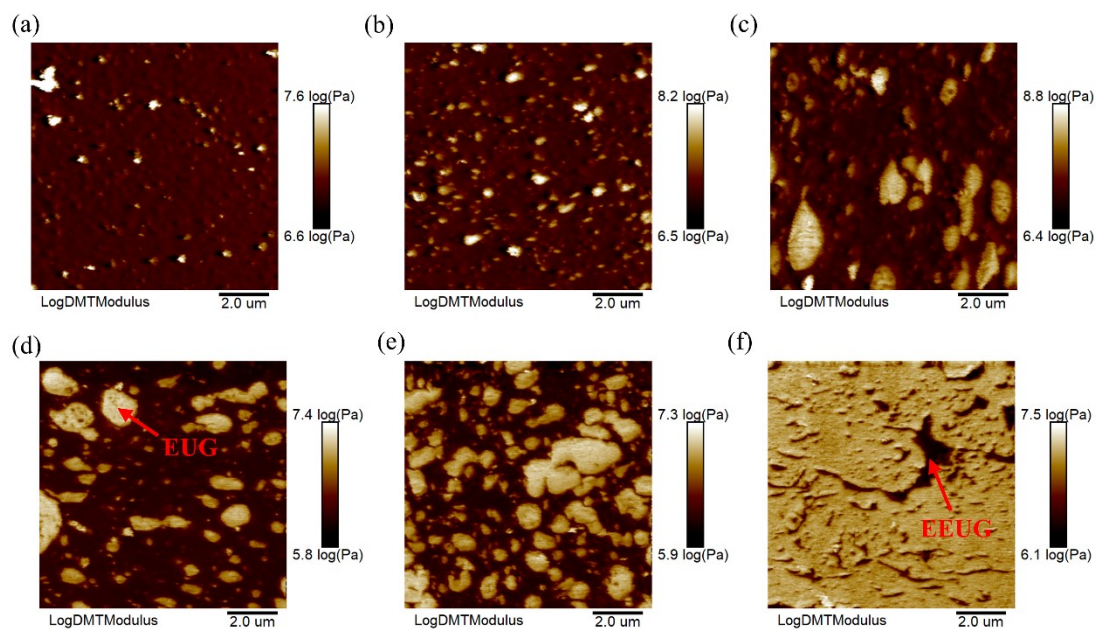

**Figure S6.** AFM LogDMTModulus image of (a) E0-DTSA, (b) E10-DTSA, (c) E20-DTSA, (d) E30-DTSA, (e) E40-DTSA, (f) E50-DTSA.

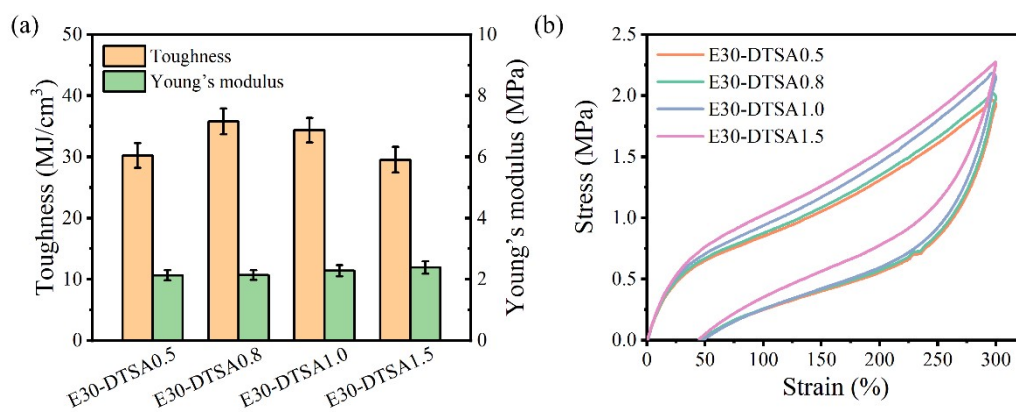

**Figure S7.** (a) Toughness and Young's modulus of E30-DTSA<sub>y</sub>. (b) Loading-unloading curves for E30-DTSA<sub>y</sub> under strain of 300%.

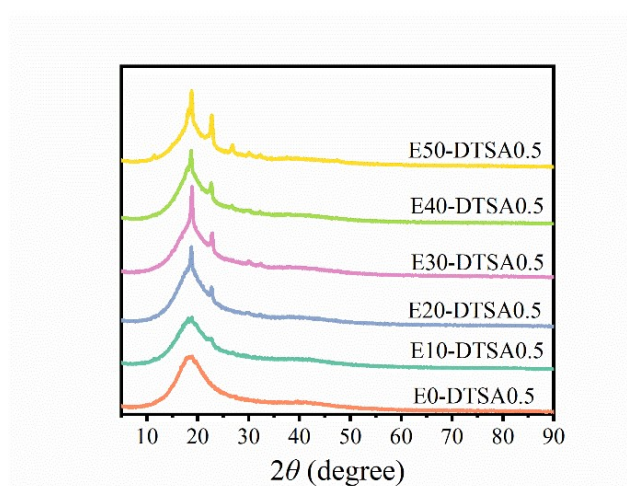

**Figure S8.** WAXD patterns of  $E_x$ -DTSA0.5.

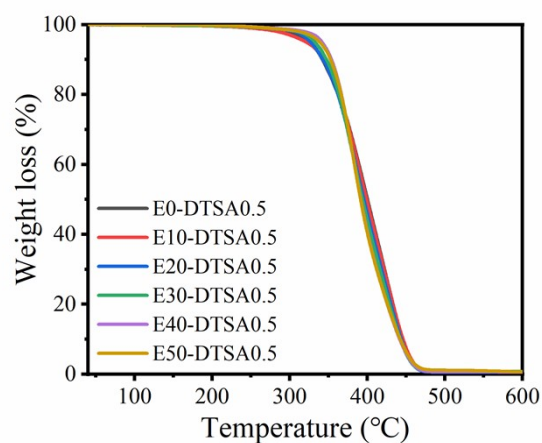

**Figure S9.** TGA curves of  $E_x$ -DTSA0.5.

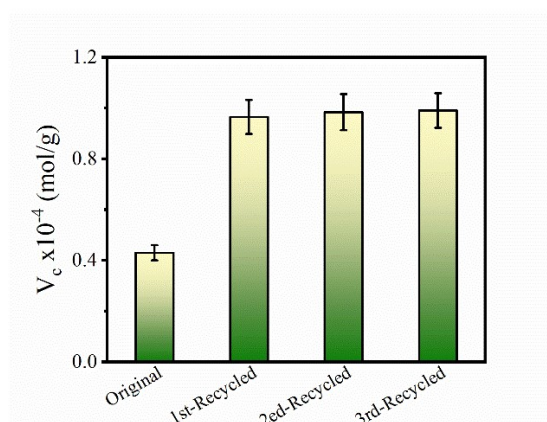

**Figure S10.** Crosslinking density of E30-DTSA0.5 after recycling by hot pressing. The crosslink density was evaluated by using the Flory–Huggins equations.

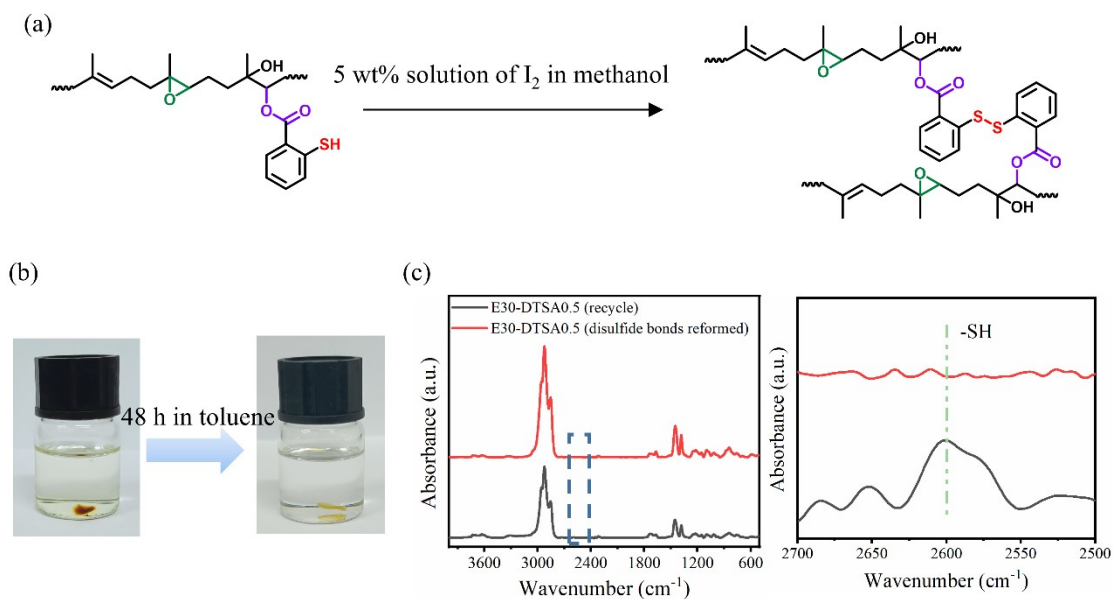

**Figure S11.** Disulfide bond reformed of the recovered samples. (a) Equation for the oxidation of thiol to disulfide bonds. (b) Photos of samples soaked in toluene for 48 h after disulfide bond reformed. Only swelling occurred in the sample, indicating that a new cross-linking network was established. (c) FT-IR spectra of samples before and after disulfide bonds reformed. When the thiol was oxidized to disulfide, the stretching vibration peak of the thiol at  $2600\text{cm}^{-1}$  disappeared.

## Reference

- [1] F. Yang, Q. Liu, X. Li, L. Yao, Q. Fang, *Polymer Bulletin* 2017, 74, 3657.
- [2] Masahiro Furutani, K. Okuma, K. Arimitsu, *Journal of Photopolymer Science and Technology* 2019, 32, 623.
